# Supplementary material for: Autophagy Reprograms Alveolar Progenitor Cell Metabolism in Response to Lung Injury
Source: PubMed Central journal article supplement (PMC7066233; doi:10.1016/j.stemcr.2020.01.008), 2020-02-13
Supplement: mmc1.pdf [file mmc1.pdf]

**Stem Cell Reports, Volume 14**

**Supplemental Information**

**Autophagy Reprograms Alveolar Progenitor Cell Metabolism in Response to Lung Injury**

**Xue Li, Junping Wu, Xin Sun, Qi Wu, Yue Li, Kuan Li, Qiuyang Zhang, Yu Li, E. Dale Abel, and Huaiyong Chen**

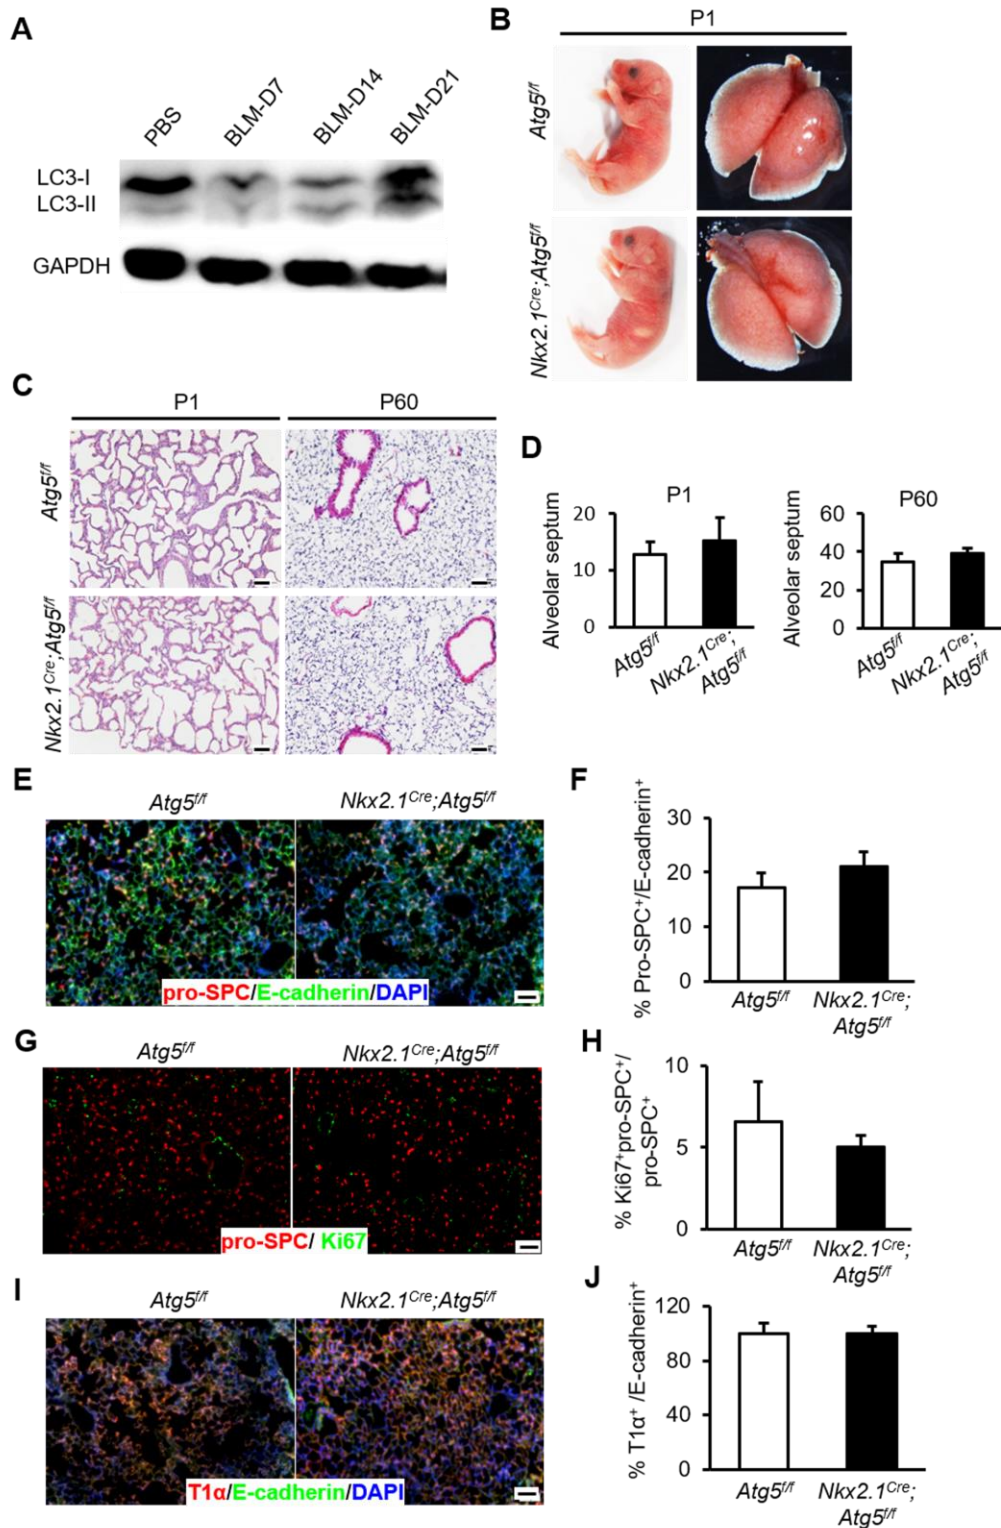

**Figure S1. Autophagy in lung development and lung injury, related to Figure 1**

(A) Representative images of western blot analysis of LC3-II and LC3-I expression in lung tissues harvested from mice at the indicated time points after bleomycin challenge (n=5). (B) Representative images of *Atg5<sup>fl/fl</sup>* mice and *Nkx2.1<sup>Cre</sup>;Atg5<sup>fl/fl</sup>* mice and their lungs at day 1 after birth (n=5). (C) Hematoxylin and eosin staining indicates no difference in lung sections from *Atg5<sup>fl/fl</sup>* mice and *Nkx2.1<sup>Cre</sup>;Atg5<sup>fl/fl</sup>* mice at day 1 and 60 after birth (n=5). (D) Alveolar septum is comparable between

*Atg5<sup>fl/fl</sup>* mice and *Nkx2.1<sup>Cre</sup>;Atg5<sup>fl/fl</sup>* mice (n=3). (E-F) IF staining demonstrates that pro-SPC<sup>+</sup> cells in total E-cadherin<sup>+</sup> cells is similar in lungs between adult *Atg5<sup>fl/fl</sup>* mice and *Nkx2.1<sup>Cre</sup>;Atg5<sup>fl/fl</sup>* mice (n=3). (G-H) No difference was observed in Ki67<sup>+</sup>pro-SPC<sup>+</sup> cells in total pro-SPC<sup>+</sup> cells between adult *Atg5<sup>fl/fl</sup>* mice and *Nkx2.1<sup>Cre</sup>;Atg5<sup>fl/fl</sup>* mice (n=3). (I-J) Immunofluorescence staining demonstrates that the number of T1α<sup>+</sup> cells in total E-cadherin<sup>+</sup> cells is similar in lungs between adult *Atg5<sup>fl/fl</sup>* mice and *Nkx2.1<sup>Cre</sup>;Atg5<sup>fl/fl</sup>* mice (n=3). All data shown are mean ± SD. Scale bars, 50 μm.

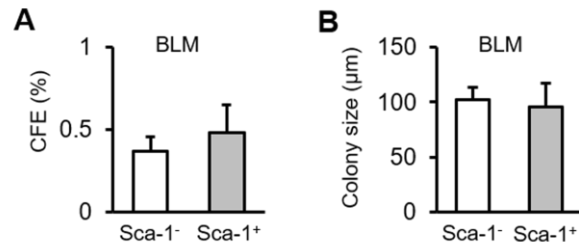

**Figure S2. Sca1<sup>+</sup> alveolar epithelial cells and AT2 cells exhibit similar proliferation potential, related to Figure 1**

(A-B) CFEs and Size of organoids derived from Sca-1<sup>+</sup> alveolar epithelial cells and AT2 cells isolated from mice 14 days after intratracheal instillation of bleomycin (n=3). All data shown are mean  $\pm$  SD.

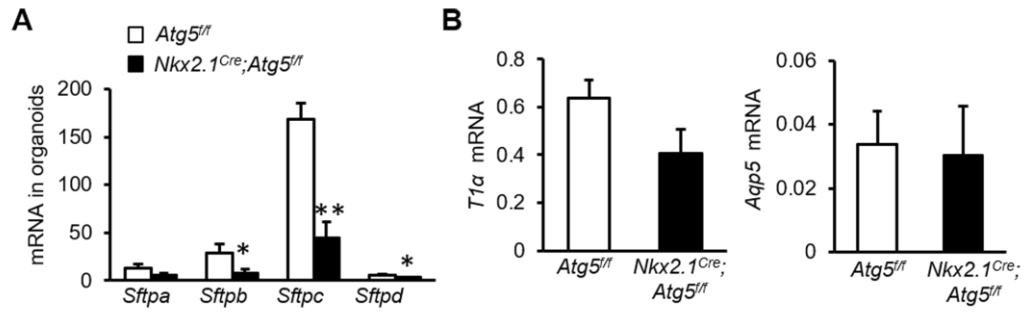

**Figure S3. Expression of surfactant genes and AT1 marker genes in organoid cultures of survived AT2 cells during bleomycin injury, related to Figure 2**

Quantitative PCR was conducted to analyze the expression of surfactant genes *Sftpa*, *Sftpb*, *Sftpc*, and *Sftpd* (A) and AT1 cell marker genes *T1a* and *Aqp5* (B) in organoid cultures of AT2 cells isolated from *Atg5<sup>fl/fl</sup>* or *Nkx2.1<sup>Cre</sup>;Atg5<sup>fl/fl</sup>* mice at day 14 after BLM injury (n=4). \*p < 0.05, \*\*p < 0.01; all data shown are mean ± SD.

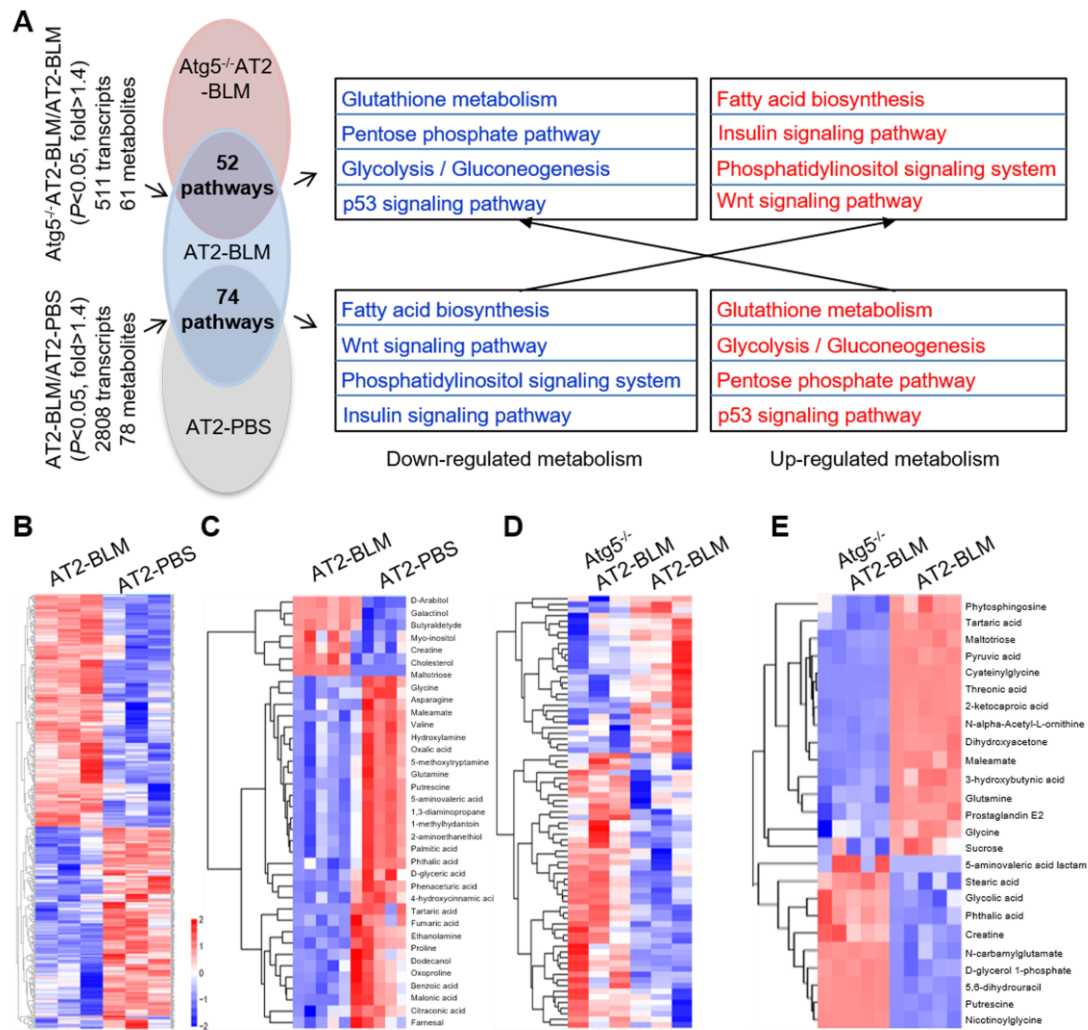

**Figure S4. Autophagy drives metabolic changes in AT2 cells during bleomycin-induced lung injury, related to Figure 3**

(A) Gene profiling showing that 2808 transcripts exhibited significant deregulation in AT2-BLM versus AT2-PBS (AT2-BLM / AT2-PBS,  $p < 0.05$ ,  $>1.4$ -fold). Of the 188 detected metabolites, 78 were significantly altered. Integrated transcriptional and biochemical profiling identified 74 pathways altered in mouse AT2 cells from BLM- treated *Atg5<sup>ff</sup>* mice (AT2-BLM) versus PBS-treated *Atg5<sup>ff</sup>* mice (AT2-PBS). We observed 511 transcripts that were significantly deregulated in *Atg5<sup>-/-</sup>* AT2-BLM versus AT2-BLM (*Atg5<sup>-/-</sup>* AT2-BLM / AT2-BLM,  $p < 0.05$ ,  $>1.4$ -fold). Sixty-one metabolites were significantly altered in *Atg5<sup>-/-</sup>* AT2-BLM versus AT2-BLM (*Atg5<sup>-/-</sup>* AT2-BLM / AT2-BLM,  $p < 0.05$ ,  $>1.4$ -fold). Integrated transcriptomic/metabolic profiling of these significantly altered transcripts and metabolites revealed 52 deregulated metabolic pathways in AT2 cells in response to *Atg5* loss during BLM- induced injury. (B) Heatmap showing transcriptional profiling of mouse AT2 cells isolated from control and BLM-challenged mice at day 14 ( $n=3$ ). (C) Heatmap showing metabolic profiling of mouse AT2 cells isolated from control and BLM- challenged mice at day 14 ( $n=5$ ). (D) Heatmap showing transcriptional profiling of mouse AT2 cells isolated from *Atg5<sup>ff</sup>* and *Nkx2.1<sup>Cre</sup>;Atg5<sup>ff</sup>* mice 14 d after BLM treatment ( $n=3$ ). (E) Heatmap showing metabolic profiling of mouse AT2 cells isolated from *Atg5<sup>ff</sup>* and *Nkx2.1<sup>Cre</sup>;Atg5<sup>ff</sup>* mice 14 d after BLM treatment ( $n=5$ ).

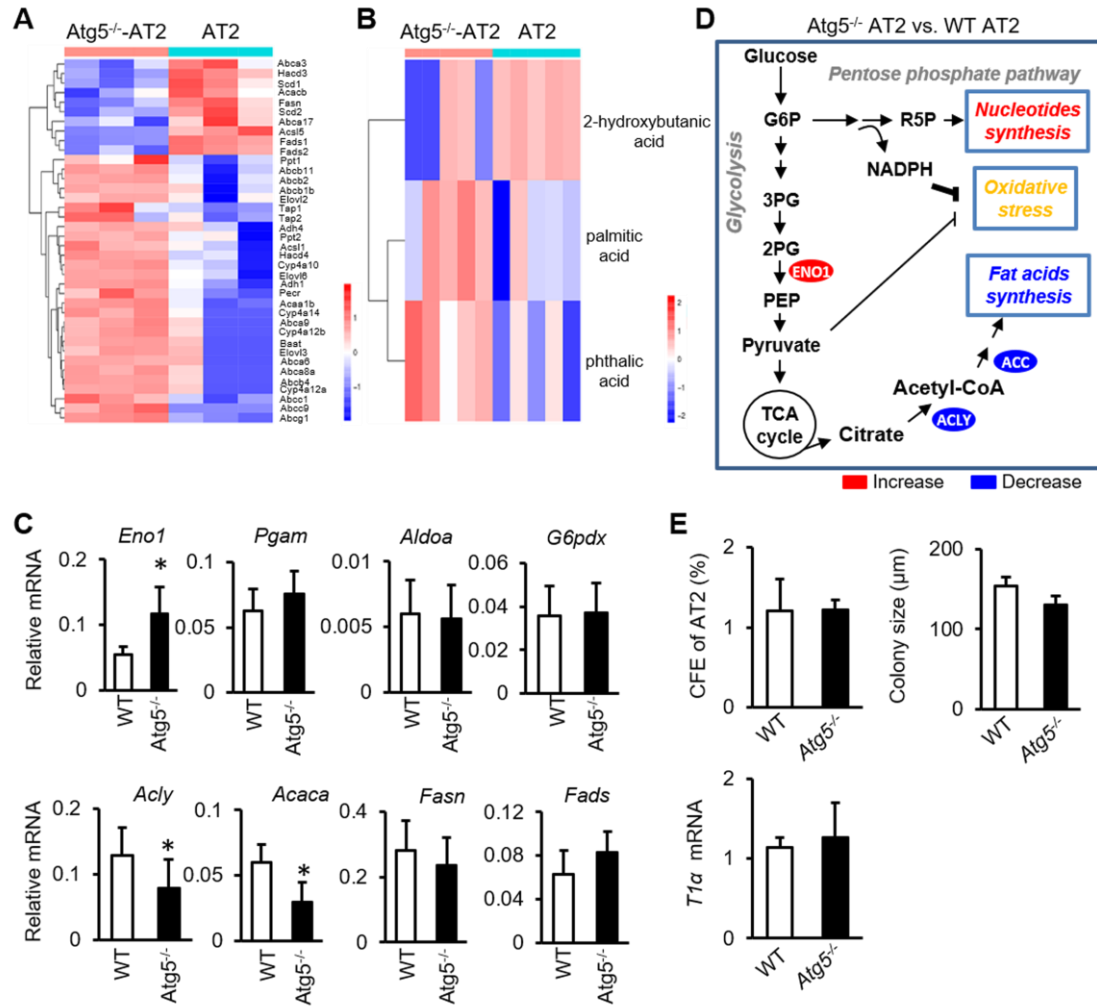

**Figure S5. Role of autophagy in metabolism and function of mouse AT2 cells at steady-state, related to Figure 3**

(A) Heatmap showing transcriptional profiling of mouse AT2 cells isolated from *Atg5<sup>fl/fl</sup>* (WT) control mice and *Nkx2.1<sup>Cre</sup>; Atg5<sup>fl/fl</sup>* (*Atg5<sup>-/-</sup>*) mice (n=3). (B) Heatmap of metabolic profiling of mouse AT2 cells isolated from WT and *Atg5<sup>-/-</sup>* mice (n=5). (C) qPCR validation of transcripts associated with glucose metabolism and fatty acid metabolism (n=3). (D) Schematic showing alterations in intermediates associated with glycolysis and synthesis of fatty acids. Increased and decreased intermediates are labeled in red and blue, respectively. Abbreviations: G6P, glucose 6-phosphate; 3PG, 3-phosphoglyceric acid; 2PG, 2-phosphoglyceric acid; and PEP, phosphoenolpyruvate. (E) CFEs, colony size and *T1a* expression in organoids of *Atg5<sup>-/-</sup>* mouse AT2 cells isolated from WT and *Atg5<sup>-/-</sup>* mice (n=5). \*p < 0.05; all data shown are means  $\pm$  SD.

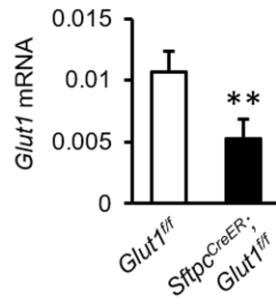

**Figure S6. Validation of genetic deletion of Glut1 in AT2 cells from *Sfpc<sup>CreER</sup>;Glut1<sup>ff</sup>* mice, related to Figure 4**

Quantitative PCR was conducted to analyze *Glut1* gene expression in AT2 cells isolated from *Glut1<sup>ff</sup>* mice and *Sfpc<sup>CreER</sup>;Glut1<sup>ff</sup>* mice (n=5). \*\*\*p < 0.01; all data shown are mean ± SD.



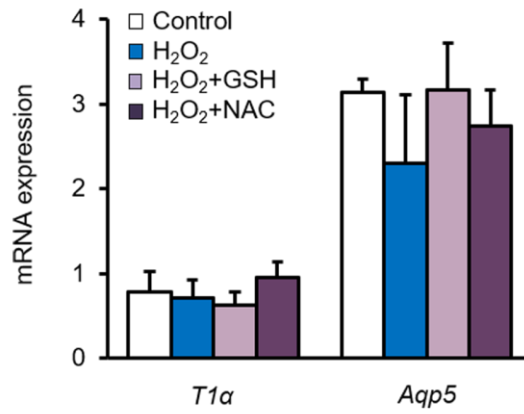

**Figure S7. H<sub>2</sub>O<sub>2</sub> does not regulate AT2 cell differentiation, related to Figure 7**

Quantitative PCR was conducted to analyze the expression of *T1α* and *Aqp5* in organoid cultures of mouse AT2 cells under indicated conditions (n=6). All data shown are mean ± SD.

**Table S1. Differential genes in AT2 cells in response to BLM injury, related to Figure 3**

| <b>Gene</b> | <b>Ave.<br/>AT2-BLM</b> | <b>Ave.<br/>AT2-PBS</b> | <b>Fold<br/>AT2-BLM/AT2-PBS</b> | <b><i>p</i></b> |
|-------------|-------------------------|-------------------------|---------------------------------|-----------------|
| Cxcl5       | 32.873                  | 0.444                   | 69.773                          | 0.002           |
| Lif         | 1.310                   | 0.032                   | 65.666                          | 1.697E-11       |
| Nkx2-9      | 39.206                  | 0.479                   | 51.586                          | 8.914E-09       |
| Fam46b      | 17.263                  | 0.245                   | 45.195                          | 2.540E-05       |
| Ly6a        | 583.417                 | 12.983                  | 39.776                          | 1.466E-11       |
| Tsku        | 1.878                   | 0.035                   | 36.678                          | 4.577E-08       |
| Psrc1       | 13.541                  | 0.410                   | 34.221                          | 2.613E-17       |
| Phlda3      | 151.932                 | 4.336                   | 32.347                          | 7.375E-53       |
| Mcam        | 7.832                   | 0.211                   | 31.491                          | 8.707E-07       |
| Cldn4       | 116.635                 | 3.188                   | 31.102                          | 3.917E-04       |
| Ifit1       | 6.439                   | 0.238                   | 26.075                          | 6.949E-07       |
| Upk1b       | 1.894                   | 0.090                   | 25.855                          | 0.008           |
| Klhl6       | 0.929                   | 0.110                   | 22.710                          | 4.946E-04       |
| Orm1        | 119.754                 | 4.909                   | 21.439                          | 1.912E-36       |
| Gsta2       | 4.843                   | 0.216                   | 20.501                          | 3.272E-06       |
| Rnf128      | 7.842                   | 0.390                   | 19.769                          | 5.864E-21       |
| Mthfd11     | 0.403                   | 0.046                   | 19.323                          | 0.015           |
| Fblim1      | 2.915                   | 0.201                   | 18.354                          | 9.933E-08       |
| Wnt7a       | 3.210                   | 0.137                   | 17.337                          | 0.034           |
| Isg15       | 32.715                  | 1.807                   | 16.893                          | 0.001           |
| Tbx1        | 0.232                   | 4.337                   | 0.027                           | 0.004           |
| Gpr153      | 0.060                   | 2.020                   | 0.028                           | 5.665E-05       |
| Pon1        | 2.101                   | 56.818                  | 0.033                           | 3.819E-10       |
| Tmem132d    | 0.213                   | 4.597                   | 0.045                           | 0.006           |
| Cntfr       | 0.050                   | 0.784                   | 0.049                           | 1.791E-04       |
| Pde1b       | 0.532                   | 7.799                   | 0.055                           | 4.605E-24       |
| Cst8        | 5.318                   | 77.543                  | 0.059                           | 4.551E-37       |
| Cckar       | 0.903                   | 13.161                  | 0.068                           | 1.292E-07       |
| Bcl2a1a     | 1.766                   | 14.770                  | 0.069                           | 5.380E-12       |
| Smoc2       | 1.174                   | 16.231                  | 0.078                           | 1.805E-17       |
| Hes2        | 0.575                   | 6.619                   | 0.080                           | 4.702E-06       |
| Mturn       | 0.075                   | 1.031                   | 0.082                           | 1.291E-05       |
| Zmat4       | 0.144                   | 1.232                   | 0.082                           | 3.265E-09       |
| Avpr1a      | 0.889                   | 9.322                   | 0.086                           | 2.979E-05       |
| Bcan        | 1.006                   | 10.118                  | 0.090                           | 1.234E-20       |
| Tox3        | 0.051                   | 0.380                   | 0.090                           | 0.003           |
| Dll4        | 0.037                   | 0.361                   | 0.093                           | 0.020           |
| Fstl4       | 0.094                   | 0.922                   | 0.095                           | 3.972E-04       |
| Sc1t1       | 0.248                   | 1.557                   | 0.095                           | 3.107E-04       |
| Vpreb3      | 3.365                   | 27.085                  | 0.096                           | 5.653E-09       |

**Table S2. Differential metabolites in AT2 cells in response to BLM injury, related to Figure 3**

| <b>Metabolites</b>                    | <b>Ave.<br/>AT2-BLM</b> | <b>Ave.<br/>AT2-PBS</b> | <b>Fold<br/>AT2-BLM/<br/>AT2-PBS</b> | <b><i>p</i></b> |
|---------------------------------------|-------------------------|-------------------------|--------------------------------------|-----------------|
| N-(2-hydroxyethyl)-iminodiacetic acid | 5.937                   | 0.681                   | 8.715                                | 5.840E-05       |
| Galactinol                            | 1152.647                | 236.396                 | 4.876                                | 0.003           |
| Glucoheptonic acid                    | 22.983                  | 6.755                   | 3.402                                | 0.006           |
| D-Arabitol                            | 86.667                  | 27.354                  | 3.168                                | 0.003           |
| Erythrose                             | 25.248                  | 11.346                  | 2.225                                | 1.926E-04       |
| Cholesterol                           | 0.554                   | 0.287                   | 1.929                                | 6.099E-05       |
| Butyraldehyde                         | 7.831                   | 4.669                   | 1.677                                | 0.001           |
| Oxamic acid                           | 1.123                   | 0.691                   | 1.625                                | 2.875E-05       |
| 3,6-Anhydro-D-galactose               | 0.548                   | 0.368                   | 1.489                                | 0.017           |
| Creatine                              | 1.287                   | 0.910                   | 1.415                                | 0.001           |
| Itaconic acid                         | 2.086                   | 11.062                  | 0.189                                | 0.010           |
| Dodecanol                             | 1.745                   | 7.579                   | 0.230                                | 0.037           |
| 4-Hydroxyquinazoline                  | 0.201                   | 0.847                   | 0.237                                | 0.003           |
| Oxamide                               | 0.603                   | 2.289                   | 0.264                                | 0.007           |
| Oxoproline                            | 20.349                  | 70.284                  | 0.290                                | 0.016           |
| Fumaric acid                          | 0.426                   | 1.320                   | 0.323                                | 0.002           |
| Citraconic acid                       | 0.029                   | 0.077                   | 0.381                                | 0.002           |
| Pelargonic acid                       | 0.328                   | 0.806                   | 0.407                                | 7.404E-04       |
| Asparagine                            | 0.068                   | 0.163                   | 0.418                                | 0.009           |
| D-Altrose                             | 1.391                   | 3.295                   | 0.422                                | 3.048E-05       |

**Table S3. Differential genes in Atg5<sup>-/-</sup> AT2 vs AT2 cells in response to BLM injury, related to Figure 3**

| <b>Gene</b> | <b>Ave.</b><br><b>Atg5<sup>-/-</sup> AT2-BLM</b> | <b>Ave.</b><br><b>AT2-BLM</b> | <b>Fold</b><br><b>Atg5<sup>-/-</sup> AT2-BLM/ AT2-BLM</b> | <b>P</b>  |
|-------------|--------------------------------------------------|-------------------------------|-----------------------------------------------------------|-----------|
| Csf2rb2     | 0.392                                            | 0.082                         | 9.001                                                     | 0.031     |
| Il27ra      | 0.338                                            | 0.041                         | 8.938                                                     | 0.023     |
| Zfhx4       | 0.089                                            | 0.008                         | 8.483                                                     | 0.019     |
| Nphs2       | 1.840                                            | 0.244                         | 7.799                                                     | 0.043     |
| Cd200r4     | 0.420                                            | 0.077                         | 6.960                                                     | 0.030     |
| Prkar2b     | 0.574                                            | 0.106                         | 5.969                                                     | 0.014     |
| Aspn        | 0.348                                            | 0.107                         | 5.843                                                     | 0.042     |
| Mturn       | 0.413                                            | 0.075                         | 5.412                                                     | 0.006     |
| Ear2        | 15.719                                           | 5.016                         | 5.324                                                     | 0.016     |
| Slc16a8     | 1.336                                            | 0.240                         | 5.132                                                     | 0.038     |
| Gm14295     | 0.287                                            | 0.081                         | 5.027                                                     | 0.003     |
| Rgs14       | 1.276                                            | 0.453                         | 4.437                                                     | 0.038     |
| Gm14569     | 0.385                                            | 0.112                         | 4.246                                                     | 0.009     |
| Cap1        | 11.631                                           | 2.611                         | 4.005                                                     | 3.267E-08 |
| Tbc1d30     | 4.122                                            | 1.057                         | 3.999                                                     | 0.023     |
| Phlpp1      | 0.720                                            | 0.267                         | 3.973                                                     | 0.008     |
| Bcan        | 3.666                                            | 1.006                         | 3.932                                                     | 1.673E-05 |
| Rfwd2       | 0.216                                            | 0.069                         | 3.916                                                     | 0.040     |
| Prex1       | 0.900                                            | 0.304                         | 3.891                                                     | 0.004     |
| Catsperg1   | 0.204                                            | 0.057                         | 3.882                                                     | 0.014     |
| Serpinb9b   | 0.184                                            | 4.216                         | 0.038                                                     | 0.043     |
| Fbln1       | 0.054                                            | 0.338                         | 0.069                                                     | 0.048     |
| Reep2       | 0.060                                            | 0.547                         | 0.091                                                     | 0.049     |
| Cmah        | 0.016                                            | 0.065                         | 0.103                                                     | 0.023     |
| Zfp697      | 0.036                                            | 0.273                         | 0.117                                                     | 0.011     |
| Anxa8       | 0.998                                            | 7.884                         | 0.127                                                     | 0.029     |
| Cldn4       | 14.175                                           | 116.635                       | 0.133                                                     | 0.011     |
| Gm13139     | 0.142                                            | 1.212                         | 0.145                                                     | 0.000     |
| Lrtm2       | 0.186                                            | 1.071                         | 0.176                                                     | 0.023     |
| Chdh        | 0.075                                            | 0.394                         | 0.178                                                     | 0.014     |
| Gjb4        | 0.936                                            | 5.518                         | 0.180                                                     | 0.046     |
| Slc4a11     | 0.423                                            | 2.322                         | 0.195                                                     | 0.027     |
| Ptpdc1      | 0.151                                            | 0.907                         | 0.202                                                     | 0.002     |
| Tdrkh       | 0.013                                            | 0.166                         | 0.205                                                     | 0.042     |
| Ivl         | 1.874                                            | 10.087                        | 0.207                                                     | 0.006     |
| Gm13251     | 0.062                                            | 0.332                         | 0.210                                                     | 0.019     |
| Lif         | 0.303                                            | 1.310                         | 0.219                                                     | 0.000     |
| Zdhhc15     | 0.162                                            | 0.722                         | 0.221                                                     | 0.017     |
| Fam46b      | 3.508                                            | 17.263                        | 0.222                                                     | 0.020     |
| Ugt1a6b     | 3.804                                            | 10.853                        | 0.230                                                     | 0.025     |

**Table S4. Differential metabolites in Atg5<sup>-/-</sup> AT2 vs AT2 cells in response to BLM injury, related to Figure 3**

| <b>Metabolites</b>       | <b>Ave. Atg5<sup>-/-</sup><br/>AT2-BLM</b> | <b>Ave.<br/>AT2-BLM</b> | <b>Fold<br/>Atg5<sup>-/-</sup> AT2-BLM/<br/>AT2-BLM</b> | <b><i>p</i></b> |
|--------------------------|--------------------------------------------|-------------------------|---------------------------------------------------------|-----------------|
| Putrescine               | 38.162                                     | 0.185                   | 206.070                                                 | 4.933E-10       |
| N-Methyl-DL-alanine      | 30.726                                     | 0.186                   | 165.016                                                 | 1.187E-08       |
| 2-Monopalmitin           | 14.283                                     | 0.109                   | 130.588                                                 | 5.613E-08       |
| Nicotinoylglycine        | 25.328                                     | 0.199                   | 127.117                                                 | 5.905E-12       |
| D-(glycerol 1-phosphate) | 0.978                                      | 0.029                   | 33.166                                                  | 3.041E-07       |
| Dibenzofuran             | 37.010                                     | 2.218                   | 16.688                                                  | 3.336E-12       |
| Gallic acid              | 6.662                                      | 0.722                   | 9.232                                                   | 3.340E-12       |
| Alpha-Ecdysone           | 1.131                                      | 0.201                   | 5.631                                                   | 1.088E-07       |
| 5,6-Dihydrouracil        | 305.699                                    | 57.348                  | 5.331                                                   | 9.025E-11       |
| Glycolic acid            | 7.695                                      | 1.745                   | 4.408                                                   | 0.002           |
| Threonic acid            | 0.104                                      | 33.969                  | 0.003                                                   | 6.027E-09       |
| Halostachine             | 0.150                                      | 25.248                  | 0.006                                                   | 1.001E-06       |
| Hydroxylamine            | 0.342                                      | 41.289                  | 0.008                                                   | 9.318E-10       |
| 2-Hydroxypyridine        | 1.961                                      | 161.315                 | 0.012                                                   | 3.330E-08       |
| Pyruvic acid             | 0.194                                      | 14.890                  | 0.013                                                   | 1.525E-06       |
| 2-Ketocaproic acid       | 1.095                                      | 75.148                  | 0.015                                                   | 2.288E-08       |
| N-Acetylisatin           | 0.414                                      | 14.816                  | 0.028                                                   | 3.428E-08       |
| Aminoxyacetic acid       | 9.727                                      | 293.809                 | 0.033                                                   | 9.926E-12       |
| Farnesal                 | 3.110                                      | 86.667                  | 0.036                                                   | 9.336E-08       |
| Maltotriose              | 0.227                                      | 5.738                   | 0.040                                                   | 2.129E-06       |

**Table S5. Differential genes in Atg5<sup>-/-</sup> AT2 versus AT2 cells, related to Figure 3**

| <b>Gene</b>  | <b>Ave.<br/>Atg5<sup>-/-</sup> AT2</b> | <b>Ave.<br/>AT2</b> | <b>Fold<br/>Atg5<sup>-/-</sup> AT2/AT2</b> | <b>P</b>  |
|--------------|----------------------------------------|---------------------|--------------------------------------------|-----------|
| Sdc3         | 1.766                                  | 0.024               | 91.559                                     | 4.707E-15 |
| Ms4a4c       | 3.887                                  | 0.048               | 91.116                                     | 1.067E-04 |
| Ms4a6d       | 16.574                                 | 0.266               | 89.792                                     | 2.337E-23 |
| Ifit1        | 18.466                                 | 0.238               | 85.797                                     | 0.003     |
| Klra2        | 3.599                                  | 0.098               | 85.504                                     | 2.376E-24 |
| Fcgr4        | 13.105                                 | 0.172               | 80.494                                     | 4.379E-23 |
| Ifi204       | 8.553                                  | 0.124               | 75.610                                     | 0.002     |
| Isg15        | 121.444                                | 1.807               | 70.553                                     | 7.611E-04 |
| Cd22         | 1.711                                  | 0.018               | 66.423                                     | 1.536E-04 |
| Sla          | 8.707                                  | 0.087               | 65.336                                     | 2.464E-19 |
| Ear2         | 206.779                                | 4.843               | 63.104                                     | 1.491E-93 |
| Ccr1         | 8.709                                  | 0.136               | 61.330                                     | 1.308E-25 |
| Cd84         | 1.600                                  | 0.031               | 59.509                                     | 1.636E-25 |
| Ifit3        | 21.963                                 | 0.430               | 58.318                                     | 0.004     |
| Arhgap30     | 3.561                                  | 0.062               | 57.993                                     | 5.231E-23 |
| Nkx2-9       | 36.963                                 | 0.479               | 56.612                                     | 5.666E-30 |
| Dkk3         | 1.345                                  | 0.050               | 54.022                                     | 1.533E-06 |
| Chil3        | 732.883                                | 13.674              | 52.479                                     | 2.364E-32 |
| Apbb1ip      | 1.465                                  | 0.040               | 51.369                                     | 2.765E-08 |
| Wdfy4        | 0.673                                  | 0.009               | 51.067                                     | 1.066E-10 |
| Ddx3y        | 0.141                                  | 2.984               | 0.044                                      | 0.007     |
| Eif2s3y      | 0.409                                  | 5.785               | 0.068                                      | 0.015     |
| LOC108168906 | 0.006                                  | 0.056               | 0.074                                      | 0.032     |
| Zfp618       | 0.080                                  | 0.578               | 0.113                                      | 6.356E-06 |
| Frat2        | 0.473                                  | 3.248               | 0.119                                      | 2.214E-04 |
| BC021891     | 0.040                                  | 0.284               | 0.126                                      | 0.034     |
| Lca5l        | 0.093                                  | 0.436               | 0.134                                      | 0.005     |
| Fstl4        | 0.154                                  | 0.922               | 0.148                                      | 0.002     |
| Tmem132c     | 0.248                                  | 1.271               | 0.153                                      | 7.512E-05 |
| Avpr1a       | 1.511                                  | 9.322               | 0.162                                      | 5.659E-04 |
| Gpr153       | 0.428                                  | 2.020               | 0.168                                      | 0.007     |
| Tdg          | 0.783                                  | 4.439               | 0.169                                      | 0.002     |
| Nipa1        | 1.081                                  | 7.180               | 0.170                                      | 0.015     |
| Pcdhga12     | 0.146                                  | 0.903               | 0.205                                      | 0.042     |
| Cecr6        | 0.214                                  | 1.240               | 0.205                                      | 7.623E-04 |
| Tmem238      | 6.086                                  | 28.856              | 0.205                                      | 0.025     |
| Mtmr11       | 0.804                                  | 4.027               | 0.213                                      | 1.700E-06 |
| Scarf2       | 6.273                                  | 25.091              | 0.214                                      | 0.021     |
| Adamts1      | 3.920                                  | 16.955              | 0.218                                      | 7.902E-08 |
| Ppp1r1a      | 2.695                                  | 11.402              | 0.218                                      | 9.969E-06 |

**Table S6. Differential metabolites in Atg5<sup>-/-</sup> AT2 versus AT2 cells, related to Figure 3**

| <b>Metabolites</b>     | <b>Ave.<br/>Atg5<sup>-/-</sup> AT2</b> | <b>Ave.<br/>AT2</b> | <b>Fold<br/>Atg5<sup>-/-</sup> AT2/AT2</b> | <b><i>p</i></b> |
|------------------------|----------------------------------------|---------------------|--------------------------------------------|-----------------|
| Levogluconan           | 1.961                                  | 1.386               | 1.415                                      | 0.048           |
| Phthalic acid          | 2.197                                  | 1.839               | 1.195                                      | 0.015           |
| Palmitic acid          | 25.822                                 | 21.831              | 1.183                                      | 0.045           |
| Alanine                | 22.108                                 | 20.449              | 1.081                                      | 0.022           |
| 2-Hydroxybutanoic acid | 0.123                                  | 0.362               | 0.340                                      | 0.034           |

**Table S7. Sequences of primers for quantitative PCR**

| <b>Gene</b>       | <b>Forward primer</b>         | <b>Reverse primer</b>         |
|-------------------|-------------------------------|-------------------------------|
| <i>β-actin</i>    | 5'-GGCCAACCGTGAAAAGATGA-3'    | 5'-CAGCCTGGATGGCTACGTACA-3'   |
| <i>E-cadherin</i> | 5'-CTGCTGCTCCTACTGTTTCTAC-3'  | 5'-TCTTCTTCTCCACCTCCTTCT-3'   |
| <i>T1α</i>        | 5'-TGCTACTGGAGGGCTTAATGA-3'   | 5'-TGCTGAGGTGGACAGTTCCT-3'    |
| <i>Aqp5</i>       | 5'-GGTGGTCATGAATCGGTTACAGC-3' | 5'-GTCCTCCTCTGGCTCATATGTG-3'  |
| <i>Sftpa</i>      | 5'-CATCAGATTCTGCAAACAATGGG-3' | 5'-GGCTCTGGTACACATCTCTCTAA-3' |
| <i>Sftpb</i>      | 5'-ACAAGGCCCTCAATTCTGGTGC-3'  | 5'-CAGGTCATTAGCTCCTGCATGC-3'  |
| <i>Sftpc</i>      | 5'-GAAGATGGCTCCAGAGAGCATC-3'  | 5'-GGACTCGGAACCAGTATCATGC-3'  |
| <i>Sftpd</i>      | 5'-CCTCTCGCAGAGATCAGTACC-3'   | 5'-CCATCCCGTCCATCACGAC-3'     |
| <i>Atg5</i>       | 5'-TGAAAGAGAAGCAGAACCATACT-3' | 5'-GGGTGTGCCTTCATATTCAAAC-3'  |
| <i>G6pdx</i>      | 5'-CCACTCCAGAAGAAAGACCTAAG-3' | 5'-TGGCTGTTGAGGTGCTTATAG-3'   |
| <i>Pgam</i>       | 5'-GGTCTGACAGGTCTCAACAAA-3'   | 5'-GGCGGTGGGACATCATAAG-3'     |
| <i>Eno1</i>       | 5'-GATGGACGGCACAGAGAATAAA-3'  | 5'-TCAGCAATGTGGCGGTAAA-3'     |
| <i>Aldoa</i>      | 5'-CCCAGCAACAGACAGAGTTAG-3'   | 5'-GATGTCAGACAGCTCCTTCTTC-3'  |
| <i>Acly</i>       | 5'-CTCACACGGAAGCTCATCAA-3'    | 5'-TCCAGCATTCCACCAGTATTC-3'   |
| <i>Fasn</i>       | 5'-AGACCCGAACTCCAAGTTATTC-3'  | 5'-GCAGTCCTTGTATACTTCTCC-3'   |
| <i>Fads</i>       | 5'-GCTTTGAACCCACCAAGAATAAA-3' | 5'-CAGGATGTGAAGCAGGTAGAC-3'   |
| <i>Acaca</i>      | 5'-ACATTCCGAGCAAGGGATAAG-3'   | 5'-GGGATGGCAGTAAGGTCAA-3'     |
| <i>Glut1</i>      | 5'-CCTCGTGCTCTTCTTCATCTT-3'   | 5'-CTCGGGTGTCTTGTCACTTT-3'    |



## Key resources table

| Reagents or Resources                         | Source            | Identifier         |
|-----------------------------------------------|-------------------|--------------------|
| Antibodies                                    |                   |                    |
| CD24-PE                                       | eBioscience       | Cat #: 12-0242-81  |
| EpCAM-PE-Cyanine7                             | eBioscience       | Cat #: 25-5791-80  |
| Sca1-APC                                      | eBioscience       | Cat #: 17-5981-81  |
| CD31 Biotin                                   | eBioscience       | Cat #: 13-0311-85  |
| CD34 Biotin                                   | eBioscience       | Cat #: 13-0341-85  |
| CD45 Biotin                                   | eBioscience       | Cat #: 13-0451-85  |
| Streptavidin APC-eFluor 780                   | eBioscience       | Cat #: 47-4317-82  |
| 7-AAD                                         | eBioscience       | Cat #: 00-6993-50  |
| DAPI Fluoromount G                            | Southern Biotech  | Cat #: 0100-20     |
| anti-Mouse Alexa Fluor 488                    | Invitrogen        | Cat #: A21202      |
| anti-Rabbit Alexa Fluor 594                   | Invitrogen        | Cat #: A21207      |
| anti-Rat Alexa Fluor 488                      | Invitrogen        | Cat #: A21208      |
| anti-Hamster Alexa Fluor 488                  | Invitrogen        | Cat #: A21110      |
| E-cadherin (mouse)                            | BD                | Cat #: 610181      |
| T1 $\alpha$ (hamster)                         | eBioscience       | Cat #: 14-5381-81  |
| pro-SPC (rabbit)                              | Millipore         | Cat #: ab3786      |
| Ki67 (rat)                                    | eBioscience       | Cat #: 14-5698-82  |
| LC3 (rabbit)                                  | Sigma             | Cat #: L7543       |
| GAPDH                                         | Sungene Biotech   | Cat #: KM9002S     |
| Anti-Rabbit IgG (H+L)                         | Thermo Fisher     | Cat #: 31460       |
| Chemicals, Peptides, and Recombinant Proteins |                   |                    |
| O.C.T. compound                               | Tissue-Tek        | Cat #: 4583        |
| Hydrogen peroxide solution                    | Sigma             | Cat #: H1009-5mL   |
| L-Glutathione reduced (GSH)                   | Sigma             | Cat #: V900456-5G  |
| N-acetyl-L-cysteine (NAC)                     | Sigma             | Cat #: A7250-10G   |
| 2-Deoxyglucose (2-DG)                         | Sigma             | Cat #: D8375-1G    |
| 6-amino-nicotinamide (6-AN)                   | Sigma             | Cat #: A68203-1G   |
| 3-Bromopyruvic (3-BrPA)                       | Santa Cruz        | Cat #: sc-260854   |
| BMS-303141                                    | Tocris Bioscience | Cat #: 4609        |
| Orlistat                                      | Sigma             | Cat #: O4139-25mg  |
| Tamoxifen                                     | Sigma             | Cat #: T5648-1G    |
| Corn Oil                                      | Sigma             | Cat #: C8267-500mL |
| Elastase                                      | Worthington       | Cat #: LS002279    |

|                                               |                         |                                        |
|-----------------------------------------------|-------------------------|----------------------------------------|
|                                               | Biochemical Corporation |                                        |
| Growth factor reduced Matrigel                | BD Pharmingen           | Cat #: 356231                          |
| Masson's trichrome stain                      | MXB Biotechnologies     | Cat #: MST-8004                        |
| Hematoxylin                                   | ZSQB-BIO                | Cat #: 322350                          |
| Eosin solution                                | ZSQB-BIO                | Cat #: ZLI9613                         |
| Fluorometric Hydrogen Peroxide Assay Kit      | Sigma                   | Cat #: MAK165-1KT                      |
| Insulin/transferrin/selenium                  | Sigma                   | Cat #: I3146                           |
| DMEM/F12                                      | Gibco                   | Cat #: 11320-033                       |
| Ethylene glycol-bis (EGTA)                    | Sigma                   | Cat #: E8145-10G                       |
| Deoxyribonuclease 1                           | Sigma                   | Cat #: DN-25                           |
| SB431542                                      | Sigma                   | Cat #: S4317                           |
| Penicillin-streptomycin                       | Gibco                   | Cat #: 15140-122                       |
| HEPES                                         | Sigma                   | Cat #: H0087                           |
| Thincert cell culture insert                  | Greiner Bio-One         | Cat #: 662641                          |
| Hank's Balanced Salt Solution (HBSS)          | Cellgro                 | Cat #: 21-023-CV                       |
| FBS                                           | Gibco                   | Cat #: 16000-044                       |
| Red Blood Cell Lysing Buffer                  | Sigma                   | Cat #: R7767-100mL                     |
| TRIzol™ LS Reagent                            | Invitrogen              | Cat #: 10296010                        |
| miRNA Isolation Kit                           | Ambion                  | Cat #: 1561                            |
| TruSeq Stranded mRNA LTSample Prep Kit        | Illumina                | Cat #: RS-122-2101                     |
| Agencourt AMPure XP                           | BECKMAN COULTER         | Cat #: A63881                          |
| SSIII                                         | Invitrogen              | Cat #: 18080044                        |
| MLV                                           | Invitrogen              | Cat #: S28025-014                      |
| RRI                                           | TaKaRa                  | Cat #: 2313A                           |
| Radom Primers                                 | TaKaRa                  | Cat #: D3801                           |
| dA/T/C/GTP                                    | TaKaRa                  | Cat #: D4026A/D4029A/<br>D4028A/D4027A |
| 10xPCR Buffer                                 | Roche                   | Cat #: 11699105001                     |
| MgCl <sub>2</sub>                             | Roche                   | Cat #: 11699113001                     |
| SYBR SELECT MASTER MIX                        | Applied Biosystems      | Cat #: 4472908                         |
| <b>Experimental Models: Organisms/Strains</b> |                         |                                        |
| <i>Sftpc-CreER<sup>TM</sup></i>               | Jackson Lab.            | Stock #: 028054                        |
| <i>Nkx2.1-Cre</i>                             | Jackson Laboratories    | Stock #: 008661                        |

|                                |               |                                                         |
|--------------------------------|---------------|---------------------------------------------------------|
| <i>Atg5<sup>ff</sup></i>       | The RIKEN BRC | RBRC02975                                               |
| <i>Glut1<sup>ff</sup></i>      | N/A           | N/A                                                     |
| Biological Samples: Cell Lines |               |                                                         |
| MLg2908                        | ATCC          | CCL-206                                                 |
| Software and Algorithms        |               |                                                         |
| Trimmomatic                    | v0.36         | LEADING:3 TRAILING:3<br>SLIDINGWINDOW:4:15<br>MINLEN:50 |
| Cufflinks                      | v2.2.1        | library-type fr-firststrand                             |
| DESeq                          | v1.18.0       | pvalue<0.05,<br> log2FoldChange >1                      |
| Pheatmap                       | v3.2.0        | R package                                               |
